# Supplementary material for: Targeting Nav1.7 and Nav1.8 with a PIKfyve inhibitor to reverse inflammatory and neuropathic pain
Source: PubMed Central journal article supplement — Neurobiol Pain. 2024 Nov 29;17:100174. doi: 10.1016/j.ynpai.2024.100174 (PMC11665415; doi:10.1016/j.ynpai.2024.100174), 2024-11-29
Supplement: mmc1.pdf [file mmc1.pdf]

**Table S1.** All data for brain/ plasma measurements

| <b>Ratio of SGC-PIKFYVE-1 between Brain and Plasma following IP Administration</b> |          |           |              |                |                      |       |       |      |
|------------------------------------------------------------------------------------|----------|-----------|--------------|----------------|----------------------|-------|-------|------|
| IP Dose 30 mg/kg                                                                   |          |           |              |                |                      |       |       |      |
| Route                                                                              | Time (h) | Animal ID | Brain (ng/g) | Plasma (ng/mL) | Ratio (Brain/Plasma) | Mean  | SD    | CV   |
| IP                                                                                 | 1        | 1         | 416          | 622            | 0.669                | 0.660 | 0.019 | 2.95 |
|                                                                                    |          | 2         | 516          | 809            | 0.638                |       |       |      |
|                                                                                    |          | 3         | 444          | 659            | 0.674                |       |       |      |

**Table S2.** Data corresponding with the mean plasma and brain concentrations of SGC-PIKFYVE-1

| <b>Ratio of SGC-PIKFYVE-1 between brain and plasma</b> |                                   |                         |       |      |
|--------------------------------------------------------|-----------------------------------|-------------------------|-------|------|
| IP Dose 30 mg/kg                                       |                                   |                         |       |      |
| Mean brain Concentration (ng/g)                        | Mean plasma Concentration (ng/ml) | Mean brain/plasma ratio | SD    | CV   |
| 459                                                    | 697                               | 0.660                   | 0.019 | 2.95 |

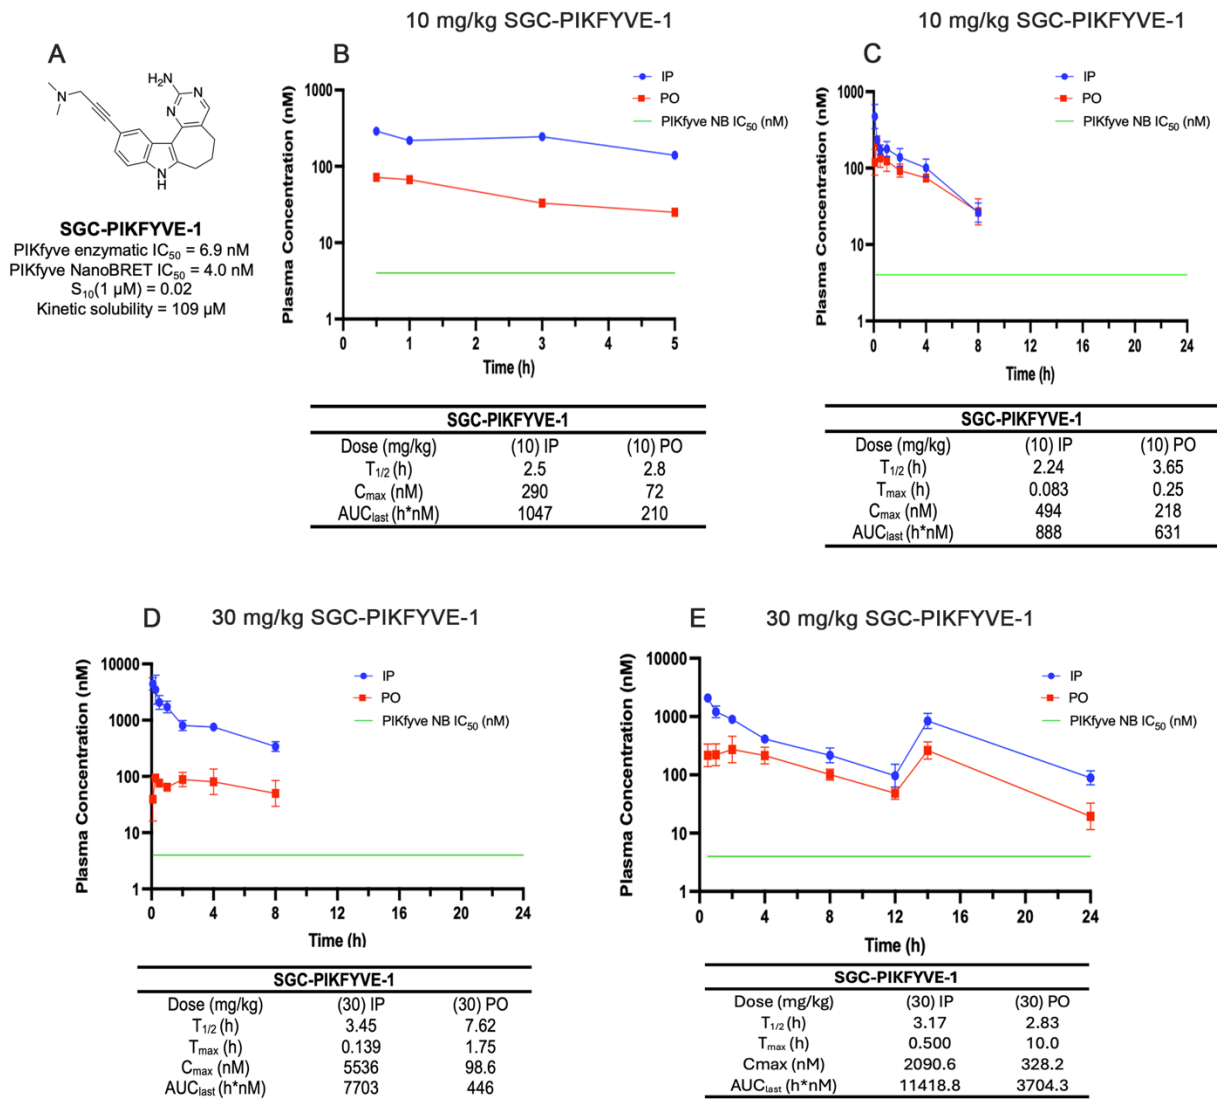

**Supplementary Fig. 1.** SGC-PIKFYVE-1 pharmacokinetic data in CD-1 mice. (A) Structure of SGC-PIKFYVE-1. (B) Snapshot pharmacokinetic data when SGC-PIKFYVE-1 was dosed at 10 mg/kg IP or PO over a 5-hour time course. (C) Snapshot pharmacokinetic data when SGC-PIKFYVE-1 was dosed at 10 mg/kg IP or PO over a 24-hour time course. (D) Snapshot pharmacokinetic data when SGC-PIKFYVE-1 was dosed at 30 mg/kg IP or PO over a 5-hour time course. (E) Data associated with the optimized dose of SGC-PIKFYVE-1 in CD-1 mice at 30 mg/kg BID.

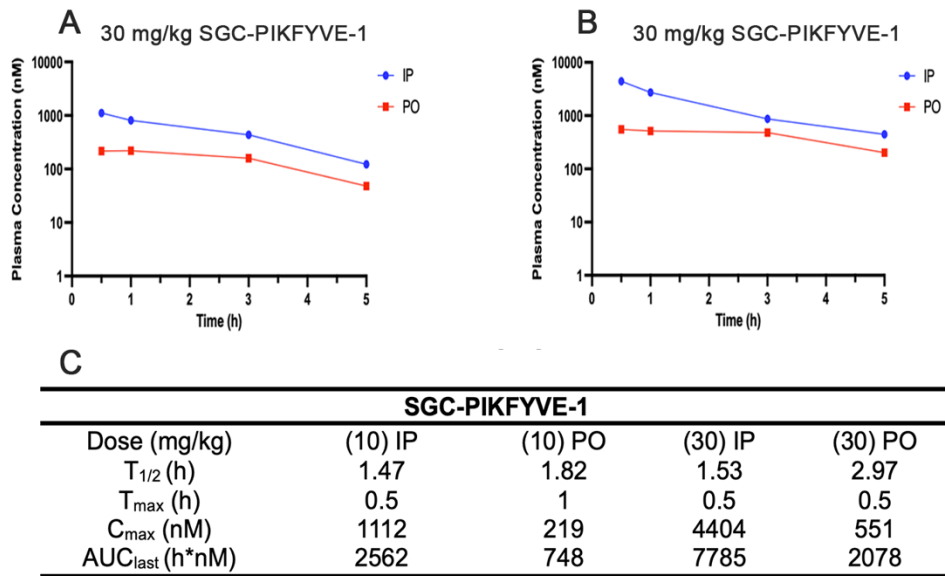

**Supplementary Fig. 2.** SGC-PIKFYVE-1 pharmacokinetic data in Balb/C mice. (A) Snapshot pharmacokinetic data when SGC-PIKFYVE-1 was dosed at 10 mg/kg IP or PO over a 5-hour time course. (B) Snapshot pharmacokinetic data when SGC-PIKFYVE-1 was dosed at 30 mg/kg IP or PO over a 5-hour time course. (C) Data generated when SGC-PIKFYVE-1 was dosed at 10 mg/kg or 30 mg/kg IP or PO.

**Data S1. Synthetic procedure to prepare SGC-PIKFYVE, related to Fig. 1, 2, and 3.**

Scheme S1. Route to prepare SGC-PIKFYVE-1, related to Figure 1

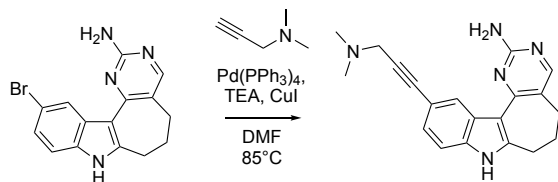

TEA: triethylamine; DMF: *N,N*-dimethylformamide

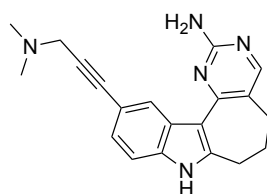

**SGC-PIKFYVE-1**

**11-(3-(dimethylamino)prop-1-yn-1-yl)-5,6,7,8-tetrahydropyrimido[4',5':3,4]cyclohepta[1,2-b]indol-2-amine (SGC-PIKFYVE-1):** A mixture of 11-bromo-5,6,7,8-tetrahydropyrimido[4',5':3,4]cyclohepta[1,2-b]indol-2-amine (100 mg, 0.304 mmol), *N,N*-dimethylprop-2-yn-1-amine (101 mg, 1.22 mmol), and triethylamine (61.5 mg, 608 μmol) in *N,N*-dimethylformamide (2 mL) was degassed, followed by addition of Pd(PPh<sub>3</sub>)<sub>4</sub> (35.1 mg, 30.4 μmol) and copper(I) iodide (5.79 mg, 30.4 μmol). The reaction mixture was heated to 85 °C and stirred overnight. After stirring overnight, the mixture was cooled to room temperature, diluted with ethyl acetate, and passed through a thin pad of celite. The filtrate was concentrated *in vacuo* and the crude residue was purified by preparative HPLC using a Phenomenex Luna 5u Phenyl-Hexyl 100Å column (75 x 30 mm, 5 μm) with a 90%/10% gradient of water/methanol as the mobile phase (flow rate = 70 mL/min) monitored at a wavelength of 254 nm to yield SGC-PIKFYVE-1 (21.6 mg, 21% yield) as a light yellow solid. The analytical data for SGC-PIKFYVE-1 matches that previously reported (Drewry et al., 2022): <sup>1</sup>H NMR (400 MHz, methanol-*d*<sub>4</sub>) δ 8.97 (s, 1H), 7.84 (s, 1H), 7.43 – 7.37 (m, 2H), 4.32 (s, 2H), 3.35 (t, *J* = 6.5 Hz, 2H), 3.05 (s, 6H), 2.85 – 2.82 (m, 2H), 2.16 – 2.10 (m, 2H). Purity (LC–MS): 100%.
